# Supplementary material for: The Effects of Iron Deficiency on the Gut Microbiota in Women of Childbearing Age
Source: MDPI journal article supplement (doi:10.3390/nu15030691), 2023-01-30
Supplement: s1 [file s1]

## Supplementary data

**Table S1.** Distributions of bacterial community at different taxonomic levels.

| Rank   | Taxa                                     | Normal (%) | PRE (%) | Post (%) |
|--------|------------------------------------------|------------|---------|----------|
| Phylum | <i>Proteobacteria</i>                    | 0.0        | 6.2     | 2.6      |
|        | <i>Actinobacteria</i>                    | 8.7        | 8.6     | 9.8      |
|        | <i>Bacteroidetes</i>                     | 33.8       | 35.7    | 34.1     |
|        | <i>Firmicutes</i>                        | 52.6       | 45.1    | 53.0     |
|        | <i>Verrucomicrobia</i>                   | 0.0        | 3.2     | 0.0      |
|        | ETC (<1%)                                | 1.0        | 1.2     | 0.5      |
| Class  | <i>Alphaproteobacteria</i>               | 1.2        | 2.6     | 0.0      |
|        | <i>Bacteroidia</i>                       | 33.7       | 35.7    | 34.1     |
|        | <i>Bacilli</i>                           | 1.2        | 1.1     | 1.6      |
|        | <i>Actinobacteria_c</i>                  | 5.2        | 6.5     | 8.3      |
|        | <i>Coriobacteriia</i> <sup>*,c</sup>     | 3.5        | 2.0     | 1.5      |
|        | <i>Negativicutes</i> <sup>*,a</sup>      | 4.5        | 8.8     | 8.4      |
|        | <i>Betaproteobacteria</i> <sup>*,b</sup> | 1.5        | 2.2     | 1.5      |
|        | <i>Erysipelotrichi</i> <sup>*,b</sup>    | 1.2        | 1.4     | 0.0      |
|        | <i>Clostridia</i> <sup>*,a</sup>         | 45.6       | 33.8    | 42.2     |
|        | <i>Verrucomicrobiae</i>                  | 0.0        | 3.0     | 0.0      |
|        | ETC (<1%)                                | 2.3        | 2.8     | 2.4      |
| Order  | <i>Bacteroidales</i>                     | 33.7       | 35.7    | 34.1     |
|        | <i>Burkholderiales</i>                   | 1.5        | 2.2     | 1.5      |
|        | <i>Clostridiales</i> <sup>*,a</sup>      | 45.6       | 33.8    | 42.2     |
|        | <i>Veillonellales</i>                    | 1.3        | 5.0     | 5.4      |
|        | <i>Rhodospirillales</i>                  | 1.2        | 2.6     | 0.0      |
|        | <i>Coriobacteriales</i> <sup>*,c</sup>   | 3.5        | 2.0     | 1.5      |
|        | <i>Acidaminococcales</i>                 | 1.0        | 1.7     | 2.6      |
|        | <i>Erysipelotrichales</i> <sup>*,b</sup> | 1.2        | 1.4     | 0.0      |
|        | <i>Selenomonadales</i>                   | 2.2        | 2.1     | 0.0      |
|        | <i>Bifidobacteriales</i>                 | 5.1        | 6.2     | 8.2      |
|        | <i>Lactobacillales</i>                   | 1.2        | 1.1     | 1.6      |
|        | <i>Verrucomicrobiales</i>                | 0.0        | 3.0     | 0.0      |
|        | ETC (<1%)                                | 2.6        | 3.2     | 3.0      |
| Family | <i>Christensenellaceae</i>               | 1.9        | 1.1     | 0.0      |
|        | <i>Bifidobacteriaceae</i>                | 5.1        | 6.2     | 8.2      |
|        | <i>Rikenellaceae</i>                     | 4.2        | 3.3     | 4.0      |
|        | <i>Rhodospirillaceae</i>                 | 1.1        | 2.5     | 0.0      |
|        | <i>Bacteroidaceae</i>                    | 17.8       | 20.9    | 18.4     |
|        | <i>Prevotellaceae</i>                    | 8.6        | 8.4     | 8.3      |
|        | <i>Veillonellaceae</i>                   | 1.3        | 5.0     | 5.4      |

|       |                                            |      |      |      |
|-------|--------------------------------------------|------|------|------|
|       | <i>Selenomonadaceae</i>                    | 2.2  | 2.1  | 0.0  |
|       | <i>Acidaminococcaceae</i>                  | 1.0  | 1.7  | 2.6  |
|       | <i>Sutterellaceae</i>                      | 1.4  | 2.2  | 1.4  |
|       | <i>Porphyromonadaceae</i>                  | 1.8  | 1.8  | 2.4  |
|       | <i>Coriobacteriaceae</i> <sup>*, c</sup>   | 3.5  | 2.0  | 1.5  |
|       | <i>Lachnospiraceae</i>                     | 12.0 | 12.6 | 11.8 |
|       | <i>Erysipelotrichaceae</i> <sup>*, b</sup> | 1.2  | 1.4  | 0.0  |
|       | <i>Ruminococcaceae</i> <sup>**, a</sup>    | 31.2 | 19.6 | 29.1 |
|       | <i>Akkermansiaceae</i>                     | 0.0  | 3.0  | 0.0  |
|       | ETC (<1%)                                  | 5.5  | 6.1  | 7.0  |
| Genus | <i>Ruminococcus_g2</i>                     | 1.8  | 0.0  | 1.3  |
|       | <i>Subdoligranulum</i>                     | 1.6  | 0.0  | 1.5  |
|       | <i>Oscillibacter</i>                       | 4.3  | 3.8  | 4.1  |
|       | <i>Collinsella</i> <sup>*, c</sup>         | 2.6  | 1.2  | 0.0  |
|       | <i>Sutterella</i>                          | 1.2  | 1.9  | 1.2  |
|       | <i>Prevotella</i>                          | 7.7  | 7.5  | 7.8  |
|       | <i>Lachnospira</i>                         | 1.6  | 1.5  | 1.5  |
|       | <i>Blautia</i>                             | 1.3  | 1.6  | 1.3  |
|       | <i>PAC001207_g</i>                         | 1.1  | 0.0  | 0.0  |
|       | <i>Clostridium_g24</i>                     | 1.0  | 1.5  | 0.0  |
|       | <i>Sporobacter</i>                         | 1.2  | 0.0  | 1.1  |
|       | <i>Bifidobacterium</i>                     | 5.0  | 6.2  | 8.1  |
|       | <i>Eubacterium_g23</i>                     | 2.4  | 1.3  | 1.7  |
|       | <i>Megamonas</i>                           | 2.2  | 2.0  | 0.0  |
|       | <i>Roseburia</i>                           | 3.0  | 1.8  | 2.4  |
|       | <i>Alistipes</i>                           | 4.2  | 3.3  | 4.0  |
|       | <i>Bacteroides</i>                         | 17.8 | 20.9 | 18.3 |
|       | <i>Parabacteroides</i>                     | 1.8  | 1.8  | 2.4  |
|       | <i>Pseudoflavonifractor</i>                | 1.4  | 1.7  | 2.0  |
|       | <i>Ruminococcus</i>                        | 1.0  | 0.0  | 0.0  |
|       | <i>LARJ_g</i>                              | 1.1  | 2.5  | 0.0  |
|       | <i>Faecalibacterium</i> <sup>**, a</sup>   | 15.3 | 7.5  | 14.9 |
|       | <i>Veillonella</i> <sup>*, c</sup>         | 0.4  | 2.0  | 3.9  |
|       | ETC (<1%)                                  | 19.0 | 30.0 | 22.5 |

Relative abundances less than 1 % were expressed as ETC. Wilcoxon rank-sum test was used to analyze the significance between the groups (\*,  $p < 0.05$ ; \*\*,  $p < 0.01$ ). Pre refers to the iron deficiency anemia (IDA) patient group, and Post refers to the group receiving iron supplementation and recovering from IDA. The superscripted a, b, and c denote the groups subjected to significance determination (a, Normal-Pre; b, Pre-Post; c, Normal-Post).
